# Supplementary material
Source: publisher site journal article supplement (https://www.dovepress.com/article/218588)
Supplement: Supplementary file 1 [file get_supplementary_file.php]

Supplementary Table 46. GO biological process (BP) analysis of differential proteins related to the occurrence of chronic inflammatory

| Biological Process                                     | Protein                                                                                                                                                             |
|--------------------------------------------------------|---------------------------------------------------------------------------------------------------------------------------------------------------------------------|
| cellular response to chemical stimulus                 | HISTONE H3.1, C-JUN, EIF2 ALPHA, PYK2, FAK, TAU, ASK1, ESTROGEN RECEPTOR-ALPHA, JUNB, IRS-1, 4E-BP1, MET, ELK1, PKC-DELTA, HSF1, CREB, MYC                          |
| positive regulation of biological process              | HISTONE H3.1, C-JUN, EIF2 ALPHA, PYK2, FAK, TAU, ASK1, ESTROGEN RECEPTOR-ALPHA, JUNB, IRS-1, EIF4E, MET, ELK1, PKC-DELTA, HSF1, CREB, STATHMIN 1, MYC, EIF4E, ATF2  |
| developmental process                                  | HISTONE H3.1, C-JUN, EIF2 ALPHA, PYK2, FAK, TAU, ASK1, ESTROGEN RECEPTOR-ALPHA, JUNB, IRS-1, 4E-BP1, MET, STATHMIN 1, ELK1, PKC-DELTA, HSF1, CREB, MYC, EIF4E, ATF2 |
| positive regulation of macromolecule metabolic process | HISTONE H3.1, C-JUN, PYK2, FAK, TAU, ASK1, ESTROGEN RECEPTOR-ALPHA, JUNB, IRS-1, MET, ELK1, PKC-DELTA, HSF1, CREB, MYC, EIF4E, ATF2                                 |
| positive regulation of cellular process                | C-JUN, EIF2 ALPHA, PYK2, FAK, TAU, ASK1, ESTROGEN RECEPTOR-ALPHA, JUNB, IRS-1, 4E-BP1, MET, STATHMIN 1, ELK1, PKC-DELTA, HSF1, CREB, MYC, EIF4E, ATF2               |
| positive regulation of metabolic process               | HISTONE H3.1, C-JUN, EIF2 ALPHA, PYK2, FAK, TAU, ASK1, ESTROGEN RECEPTOR-ALPHA, JUNB, IRS-1, MET, ELK1, PKC-DELTA, HSF1, CREB, MYC, EIF4E, ATF2                     |
| positive regulation of cellular metabolic process      | C-JUN, EIF2 ALPHA, PYK2, FAK, TAU, ASK1, ESTROGEN RECEPTOR-ALPHA, JUNB, IRS-1,                                                                                      |

|                                        |                                                                                                                                                                      |
|----------------------------------------|----------------------------------------------------------------------------------------------------------------------------------------------------------------------|
|                                        | MET, ELK1, PKC-DELTA, HSF1, CREB, MYC, EIF4E , ATF2                                                                                                                  |
| regulation of cell death               | C-JUN, EIF2 ALPHA, PYK2, FAK, TAU, ASK1, ESTROGEN RECEPTOR-ALPHA, JUNB, MET, ELK1, PKC-DELTA, HSF1, CREB, MYC, ATF2                                                  |
| single-organism developmental process  | HISTONE H3.1, C-JUN, EIF2 ALPHA, PYK2, FAK, TAU, ASK1, ESTROGEN RECEPTOR-ALPHA, JUNB, IRS-1, 4E-BP1, MET, STATHMIN 1, ELK1, PKC-DELTA, HSF1, CREB, MYC, EIF4E , ATF2 |
| response to oxygen-containing compound | C-JUN , PYK2 , FAK , ESTROGEN RECEPTOR-ALPHA, JUNB, IRS-1, EIF4E, MET, ELK1, PKC-DELTA, HSF1, CREB, ATF2, TAU, ASK1                                                  |

Supplementary Table 57-1. GO biological process (BP) analysis of differential proteins (up-regulated) related to the therapeutic effects of

| Biological Process                                     | Protein                                           |
|--------------------------------------------------------|---------------------------------------------------|
| regulation of response to stress                       | HISTONE H3.1, MYC, P53, ELK1 , ASK, P38MAPK, MEK2 |
| positive regulation of gene expression                 | HISTONE H3.1, MYC, P53, ELK1 , ASK, P38MAPK, MEK2 |
| stress-activated MAPK cascade                          | ASK, P38MAPK, MEK2, MYC, ELK1                     |
| stress-activated protein kinase signaling cascade      | ASK, P38MAPK, MEK2, MYC, ELK1                     |
| cellular response to organic substance                 | HISTONE H3.1, MYC, P53, ELK1 , ASK, P38MAPK, MEK2 |
| positive regulation of macromolecule metabolic process | HISTONE H3.1, MYC, P53, ELK1 , ASK, P38MAPK, MEK2 |
| response to ionizing radiation                         | P38MAPK, MYC, P53, ELK1                           |
| positive regulation of transcription,                  | MYC, P53, ELK1 , ASK, P38MAPK,                    |

|                                                             |                                     |
|-------------------------------------------------------------|-------------------------------------|
| DNA-templated                                               | MEK2                                |
| positive regulation of nucleic acid-templated transcription | MYC, P53, ELK1 , ASK, P38MAPK, MEK2 |
| cellular response to radiation                              | MYC, P53, ELK1 , P38MAPK            |

Supplementary Table 57-2. GO biological process (BP) analysis of differential proteins (down-regulated) related to the therapeutic effects of

| Biological Process                                | Protein                                                                                                                                                                |
|---------------------------------------------------|------------------------------------------------------------------------------------------------------------------------------------------------------------------------|
| positive regulation of cellular process           | MEK1, PKC-DELTA, MET, PKC-THETA, IRS-1, TAU , P53 , C-KIT , C-JUN , ASK1 , CREB , P44/42MAPKinase , EIF2 ALPHA , JUNB , HISTONE H2A.X, STATHMIN 1, PYK2, 4E-BP1, ELF4E |
| positive regulation of cellular metabolic process | MEK1, PKC-DELTA, MET, PKC-THETA, IRS-1, TAU , P53 , C-KIT , C-JUN , ASK1 , CREB , P44/42MAPKinase , EIF2 ALPHA , JUNB , HISTONE H2A.X, PYK2, ELF4E                     |
| enzyme linked receptor protein signaling pathway  | MEK1, PKC-DELTA, MET, PKC-THETA, IRS-1, P53, C-KIT, C-JUN, CREB, P44/42MAPKinase, JUNB, STATHMIN 1, PYK2, 4E-BP1                                                       |
| cellular response to oxygen-containing compound   | MEK1, PKC-DELTA, MET, PKC-THETA, IRS-1, TAU , P53 , C-JUN , ASK1 , CREB , P44/42MAPKinase, PYK2, 4E-BP1                                                                |
| response to inorganic substance                   | PKC-DELTA, MET, TAU, C-KIT, C-JUN, ASK1, CREB, P44/42MAPKinase, EIF2 ALPHA, JUNB, PYK2                                                                                 |
| response to oxygen-containing compound            | MEK1, PKC-DELTA, MET, PKC-THETA, IRS-1, TAU , P53 , C-JUN , ASK1 , CREB , P44/42MAPKinase, JUNB, PYK2, 4E-BP1                                                          |
| response to external                              | MEK1, PKC-DELTA, MET, PKC-THETA, TAU,                                                                                                                                  |

---

|                                                              |                                                                                                                                                                                    |
|--------------------------------------------------------------|------------------------------------------------------------------------------------------------------------------------------------------------------------------------------------|
| stimulus                                                     | P53 , C-KIT , C-JUN , ASK1 , CREB ,<br>P44/42MAPKinase , EIF2 ALPHA , JUNB ,<br>STATHMIN 1, PYK2, 4E-BP1                                                                           |
| positive regulation of<br>biological process                 | MEK1, PKC-DELTA, MET, PKC-THETA, IRS-1,<br>TAU , P53 , C-KIT , C-JUN , ASK1 , CREB ,<br>P44/42MAPKinase , EIF2 ALPHA , JUNB ,<br>HISTONE H2A.X, STATHMIN 1, PYK2, 4E-BP1,<br>ELF4E |
| positive regulation of<br>macromolecule<br>metabolic process | MEK1, PKC-DELTA, MET, PKC-THETA, IRS-1,<br>TAU , P53 , C-KIT , C-JUN , ASK1 , CREB ,<br>P44/42MAPKinase , JUNB, HISTONE H2A.X,<br>PYK2, ELF4E                                      |
| positive regulation of<br>metabolic process                  | MEK1, PKC-DELTA, MET, PKC-THETA, IRS-1,<br>TAU , P53 , C-KIT , C-JUN , ASK1 , CREB ,<br>P44/42MAPKinase , EIF2 ALPHA , JUNB ,<br>HISTONE H2A.X, PYK2, ELF4E                        |

---
